# Supplementary material for: Targeted activation of the SHP-1/PP2A signaling axis elicits apoptosis of chronic lymphocytic leukemia cells
Source: PubMed Central journal article supplement — Haematologica. 2017 Jun 15;102(8):1401–12. doi: 10.3324/haematol.2016.155747 (PMC5541874; doi:10.3324/haematol.2016.155747), 2017-08
Supplement: 2016_155747-Disclosures_and_Contributions.pdf [file 2016_155747-Disclosures_and_Contributions.pdf]

Haematologica  
HAEMATOL/2016/155747  
Version 4

Targeted activation of the SHP-1/PP2A signalling axis elicits apoptosis  
of chronic lymphocytic leukemia cells

Elena Tibaldi, Mario Angelo Pagano, Federica Frezzato, Valentina Trimarco, Monica Facco, Giuseppe Zagotto, Giovanni Ribaudo, Valeria Pavan, Luciana Bordin, Andrea Visentin, Francesca Zonta, Gianpietro Semenzato, Anna Maria Brunati, and Livio Trentin

Disclosures: None

Contributions: E. T. performed the majority of the in vitro research; M. A. P. performed some of the in vitro research, wrote and reviewed the manuscript; F. F. provided clinical patient samples and performed some of the in vitro research; V. T. provided clinical patient samples and performed some of the in vitro research; M. F. provided clinical patient samples and performed some of the in vitro research; G. Z. designed the FTY720-analogues used in this study; G.R., V.P. synthesized and purified the FTY720-analogues used in this study; L.B. performed some of the in vitro research; A.V. provided clinical patient samples; F. Z. performed some of the in vitro research; G. S. provided intellectual input into the lymphocyte studies and reviewed the manuscript; A. M. B. designed the research, reviewed and analyzed the data, participated in analysis of data and wrote the manuscript; L. T. provided clinical patient samples, analyzed the data and wrote parts of the manuscript.
