# Supplementary material for: Targeted activation of the SHP-1/PP2A signaling axis elicits apoptosis of chronic lymphocytic leukemia cells
Source: PubMed Central journal article supplement — Haematologica. 2017 Jun 15;102(8):1401–12. doi: 10.3324/haematol.2016.155747 (PMC5541874; doi:10.3324/haematol.2016.155747), 2017-08

# PP2A/SHP-1 axis may emerge as a novel attractive target for the development of alternative strategies in the treatment of chronic lymphocytic leukemia

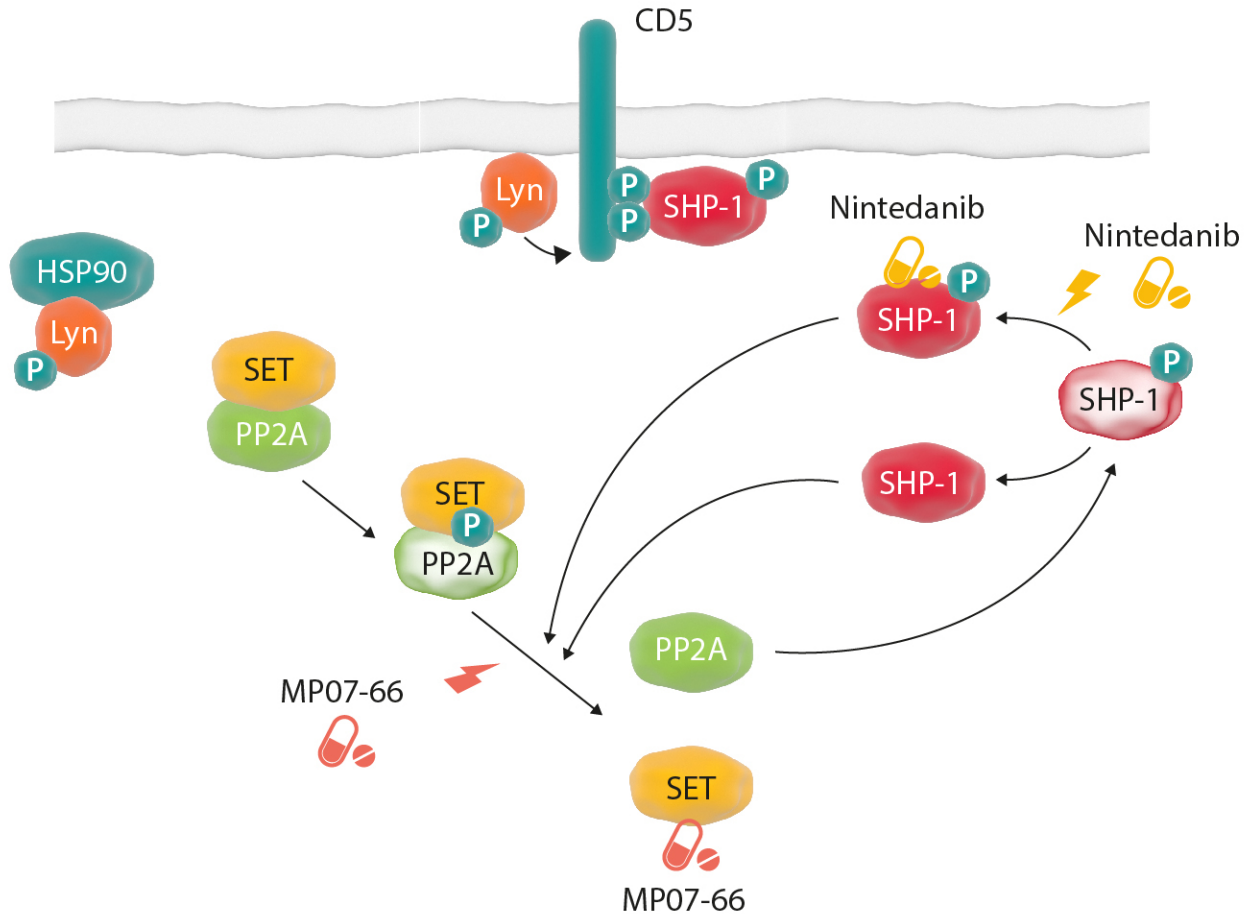

Supplement: HAEMATOL-2016-155747v4-Tibaldi-01.pdf [file HAEMATOL-2016-155747v4-Tibaldi-01.pdf]
